# Supplementary material
Source: HighWire-hosted journal article supplement (https://jnm.snmjournals.org/highwire/filestream/95033/field_highwire_adjunct_files/0/180091_Supplemental_Data.pdf)

**Supplemental figure 1. Example from a case with a large signal drop out on the DWI (right panel). In the left panel is the T2 weighted image and in the middle panel the PET image.**

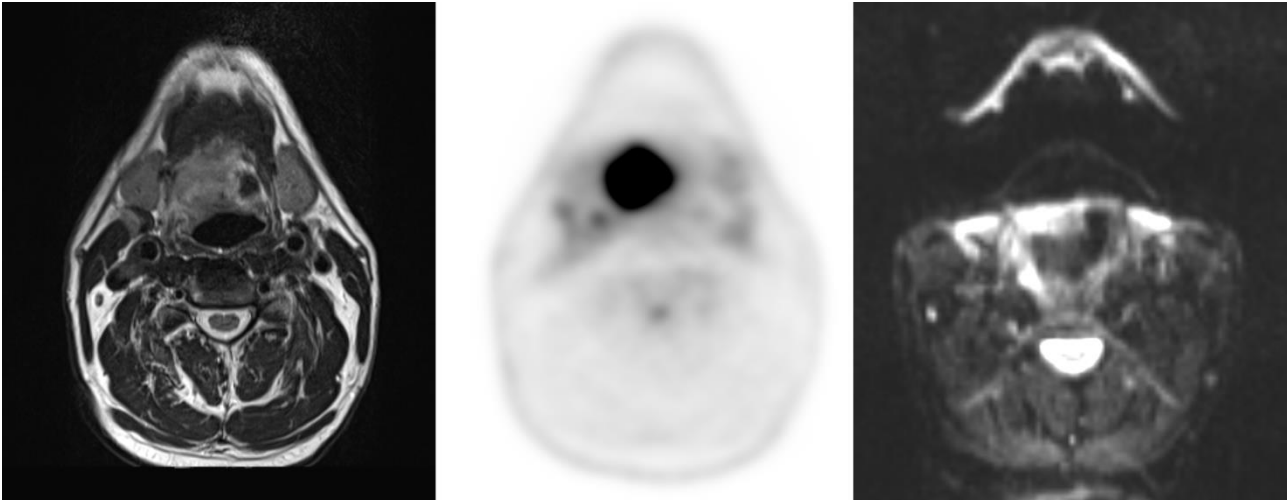

Supplemental figure 2. Cluster analysis of the correlation plot for the 11 patients included in the voxel by voxel analysis, numbered after study number. Panel to the left is from the first scan, panel to right is from the second scan.  $\rho$  is Spearman's rank correlation coefficient.

$\rho = -0.41$  ( $P < 0.0001$ )

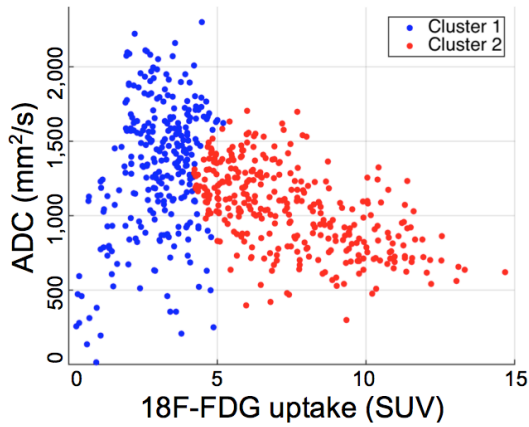

$\rho = -0.26$  ( $P < 0.0001$ )

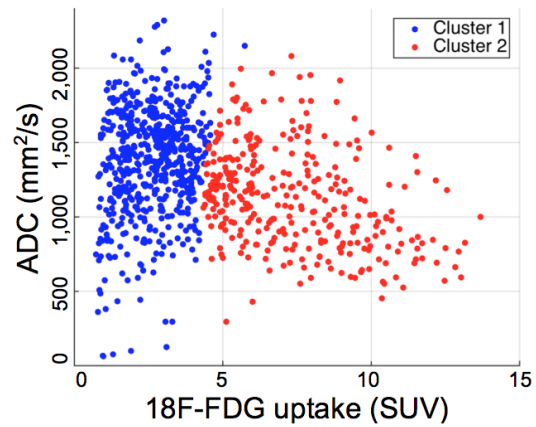

$\rho = 0.006$  ( $P = 0.86$ )

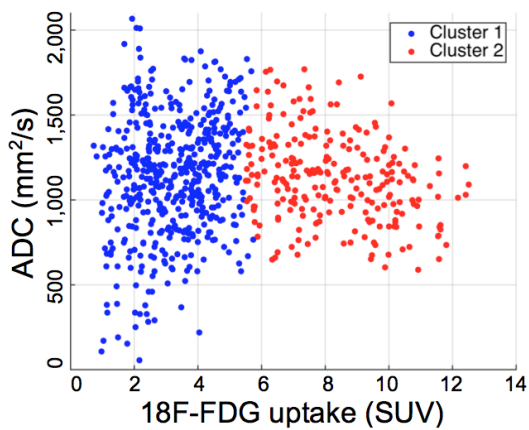

$\rho = 0.31$  ( $P < 0.0001$ )

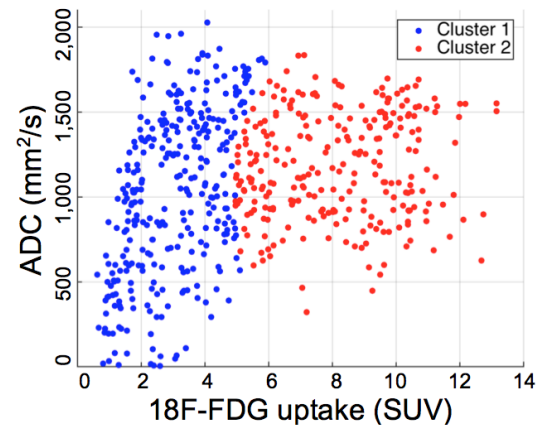

$\rho = -0.39$  ( $P < 0.0001$ )

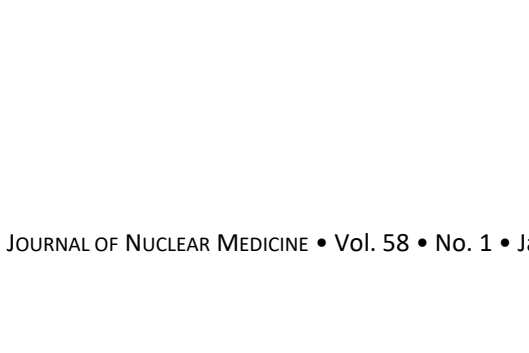

$\rho = -0.36$  ( $P < 0.0001$ )

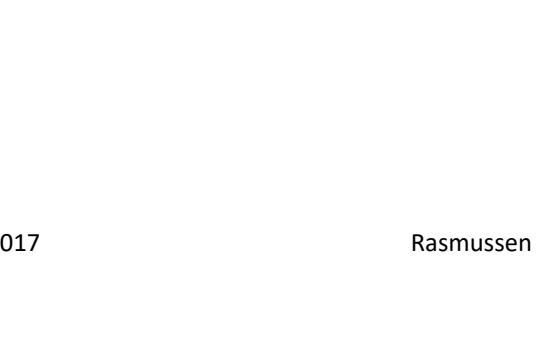

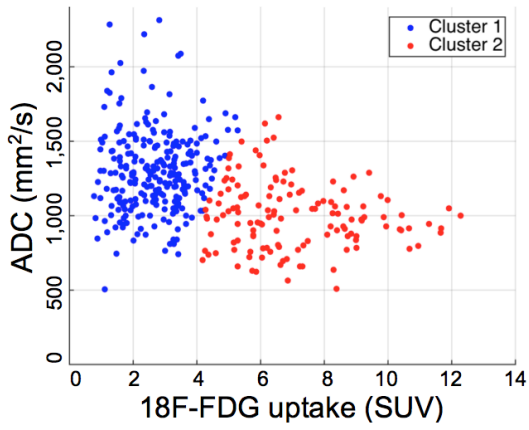

$\rho = -0.62$  ( $P < 0.0001$ )

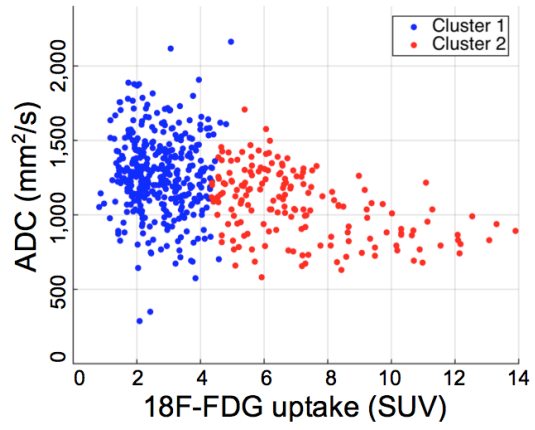

$\rho = -0.36$  ( $P < 0.0001$ )

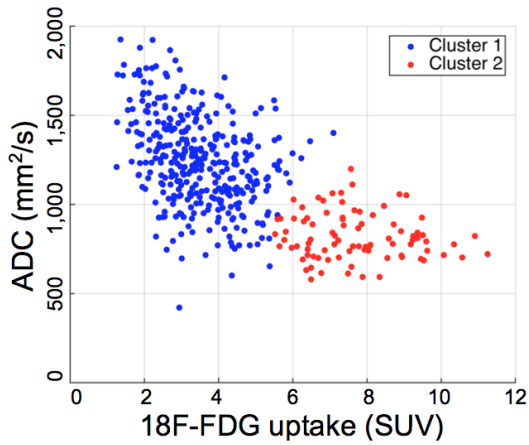

$\rho = -0.001$  ( $P = 0.93$ )

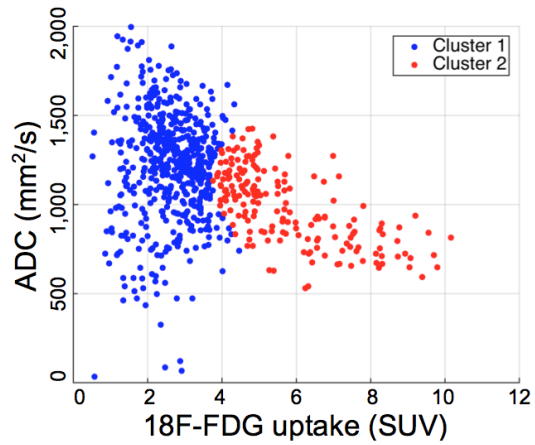

$\rho = 0.03$  ( $P = 0.57$ )

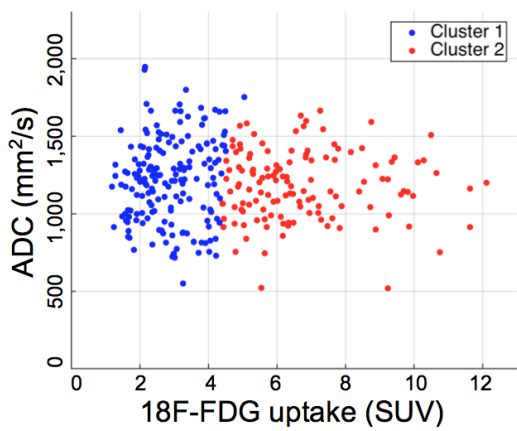

$\rho = -0.47$  ( $P < 0.0001$ )

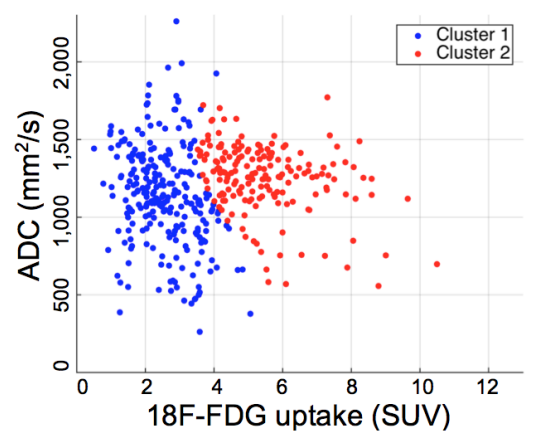

$\rho = -0.48$  ( $P < 0.0001$ )

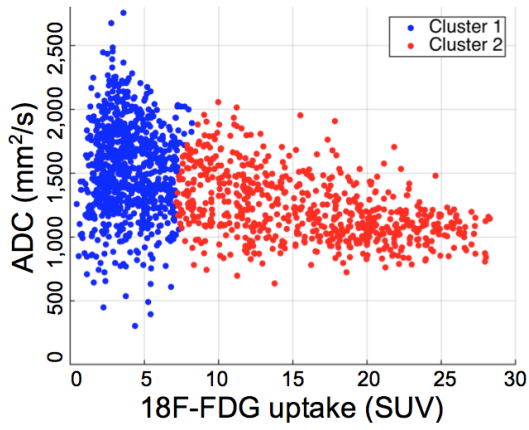

$\rho = -0.18$  ( $P = 0.0006$ )

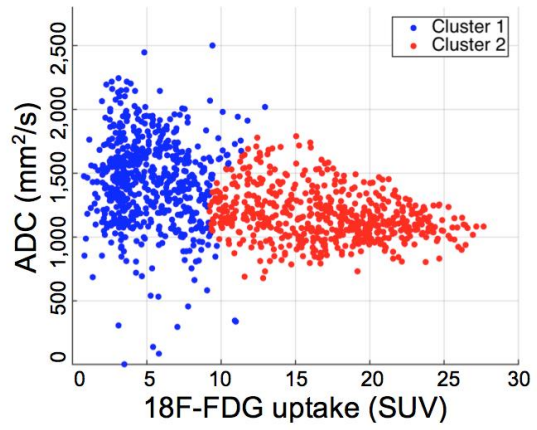

$\rho = 0.00$  ( $P = 0.998$ )

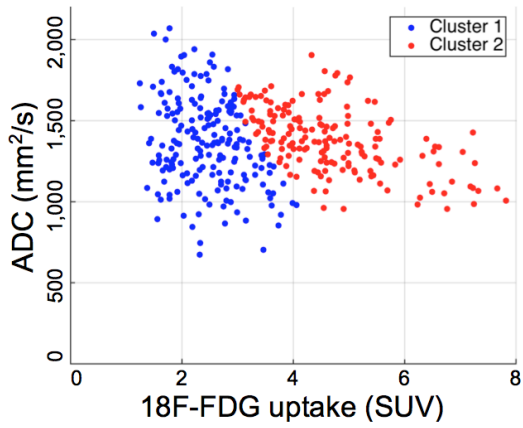

$\rho = -0.36$  ( $P < 0.0001$ )

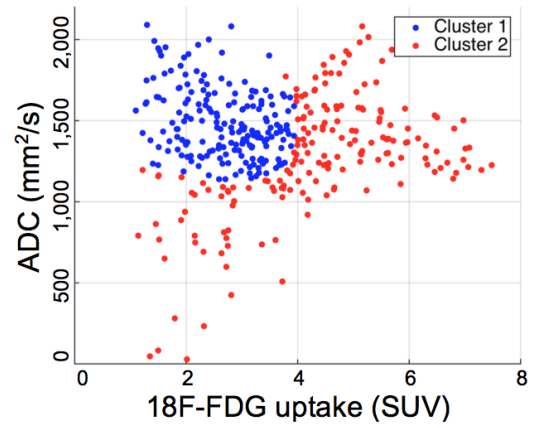

$\rho = -0.16$  ( $P < 0.0001$ )

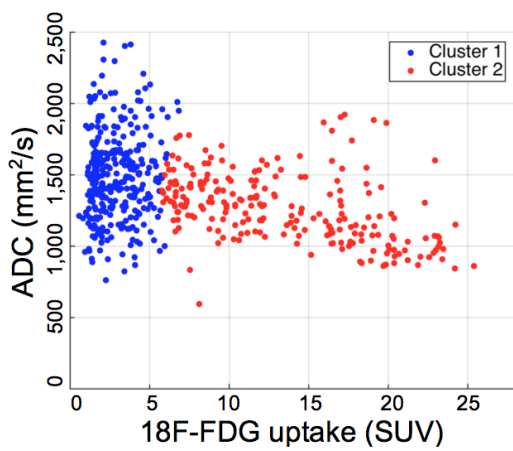

$\rho = -0.38$  ( $P < 0.0001$ )

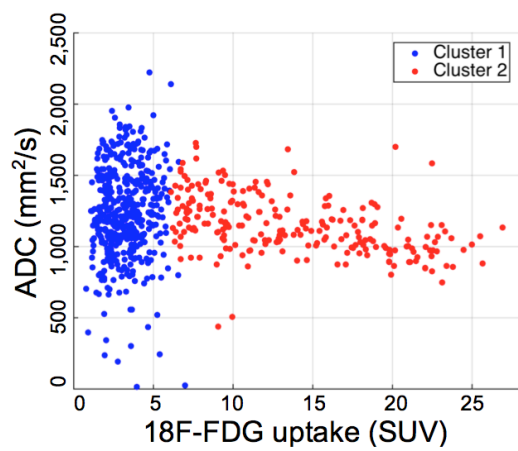

$\rho = -0.32$  ( $P < 0.0001$ )

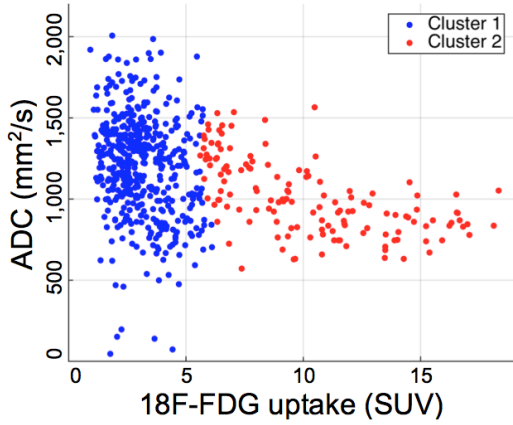

$\rho = 0.05$  ( $P = 0.19$ )

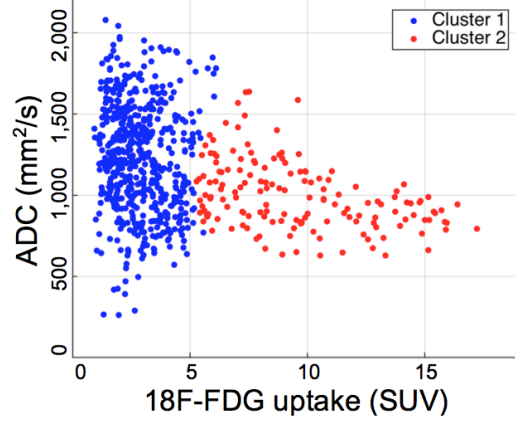

$\rho = 0.14$  ( $P = 0.003$ )

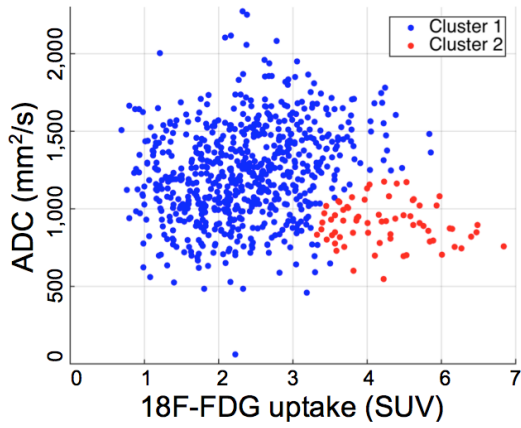

$\rho = -0.61$  ( $P < 0.0001$ )

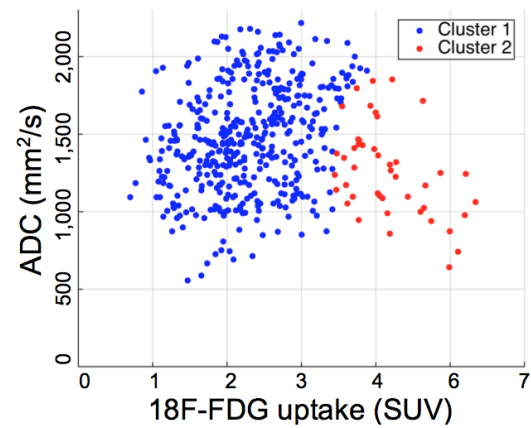

$\rho = -0.28$  ( $P < 0.0001$ )

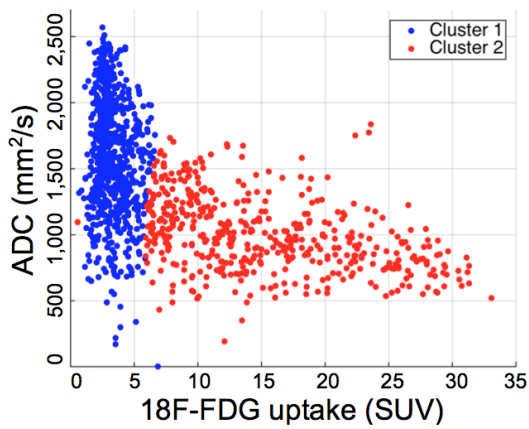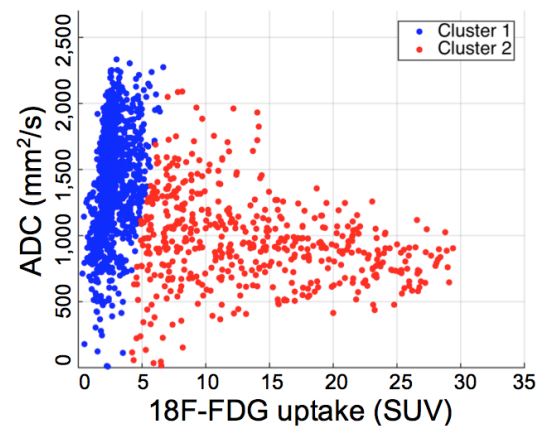

Supplement: 180091_Supplemental_Data.pdf [file 180091_Supplemental_Data.pdf]
